# Supplementary material
Source: ML conference proceedings conference paper supplement (https://openreview.net/forum?id=vdh62914QR)
Supplement: supplementary_material [file attachment]

## A Proofs

We start by providing a lemma that is useful in the proofs of our main results.

**Lemma 10 (Variance Reduction)** *Let  $\mathbf{U}_k \in \mathbb{R}^d, k \in \{1, 2, \dots, K\}$  be i.i.d standard Gaussian.<sup>4</sup> For every random vector  $\mathbf{V} \in \mathbb{R}^d$  independent of all  $\mathbf{U}_k, k \in \{1, 2, \dots, K\}$ , it is true that*

$$\mathbb{E} \left[ \left\| \frac{1}{K} \sum_{k=1}^K \langle \mathbf{V}, \mathbf{U}_k \rangle \mathbf{U}_k - \mathbf{V} \right\| \middle| \mathbf{V} \right] \leq \sqrt{\frac{3d-1}{K}} \|\mathbf{V}\|. \quad (27)$$

Different versions of Lemma 10 appear already in prior works (see, e.g., [13, Proof of Corollary 2]). For completeness and clarity we provide a short proof of Lemma 10 below (Appendix, Section A.1).

### A.1 Proof of Lemma 10

For fixed  $\mathbf{V} \in \mathbb{R}^d$ , we have due to independence

$$\begin{aligned} \mathbb{E} \left[ \left\| \frac{1}{K} \sum_{k=1}^K \langle \mathbf{V}, \mathbf{U}_k \rangle \mathbf{U}_k - \mathbf{V} \right\|^2 \right] &= \frac{1}{K^2} \mathbb{E} \left[ \left\| \sum_{k=1}^K \langle \mathbf{V}, \mathbf{U}_k \rangle \mathbf{U}_k - \mathbf{V} \right\|^2 \right] \\ &= \frac{1}{K^2} \sum_{k=1}^K \mathbb{E} [\| \langle \mathbf{V}, \mathbf{U}_k \rangle \mathbf{U}_k - \mathbf{V} \|^2] \\ &= \frac{1}{K} \mathbb{E} [\| \langle \mathbf{V}, \mathbf{U}_1 \rangle \mathbf{U}_1 - \mathbf{V} \|^2]. \end{aligned}$$

Now, again due to independence

$$\begin{aligned} \mathbb{E} [\| \langle \mathbf{V}, \mathbf{U}_1 \rangle \mathbf{U}_1 - \mathbf{V} \|^2] &= \mathbb{E} [\| \langle \mathbf{V}, \mathbf{U}_1 \rangle \mathbf{U}_1 \|^2 - 2 \langle \mathbf{V}, \mathbf{U}_1 \rangle \langle \mathbf{U}_1, \mathbf{V} \rangle + \|\mathbf{V}\|^2] \\ &= \mathbb{E} [(\langle \mathbf{V}, \mathbf{U}_1 \rangle)^2 \|\mathbf{U}_1\|^2] - 2 \mathbb{E} [\langle \mathbf{V}, \mathbf{U}_1 \rangle \langle \mathbf{U}_1, \mathbf{V} \rangle] + \|\mathbf{V}\|^2 \\ &= \mathbf{V}^T \mathbb{E} [\mathbf{U}_1 \mathbf{U}_1^T \|\mathbf{U}_1\|^2] \mathbf{V} - 2 \mathbf{V}^T \mathbb{E} [\mathbf{U}_1 \mathbf{U}_1^T] \mathbf{V} + \|\mathbf{V}\|^2 \\ &= \sum_{i=1}^d \mathbf{V}^T \mathbb{E} [\mathbf{U}_1 \mathbf{U}_1^T (U_1^{(i)})^2] \mathbf{V} - 2 \|\mathbf{V}\|^2 + \|\mathbf{V}\|^2 \\ &\leq \sum_{i=1}^d 3 \mathbf{V}^T \mathbf{V} - \|\mathbf{V}\|^2 \\ &= (3d-1) \|\mathbf{V}\|^2. \end{aligned}$$

Therefore,

$$\mathbb{E} \left[ \left\| \frac{1}{K} \sum_{k=1}^K \langle \mathbf{V}, \mathbf{U}_k \rangle \mathbf{U}_k - \mathbf{V} \right\|^2 \right] \leq \frac{(3d-1) \|\mathbf{V}\|^2}{K}.$$

Thus, if  $\mathbf{V}$  is random and independent of all  $\mathbf{U}_k$ 's, it follows that

$$\begin{aligned} \mathbb{E} \left[ \left\| \frac{1}{K} \sum_{k=1}^K \langle \mathbf{V}, \mathbf{U}_k \rangle \mathbf{U}_k - \mathbf{V} \right\| \middle| \mathbf{V} \right] &\leq \sqrt{\mathbb{E} \left[ \left\| \frac{1}{K} \sum_{k=1}^K \langle \mathbf{V}, \mathbf{U}_k \rangle \mathbf{U}_k - \mathbf{V} \right\|^2 \middle| \mathbf{V} \right]} \\ &\leq \sqrt{\frac{3d-1}{K} \|\mathbf{V}\|^2} \\ &= \sqrt{\frac{3d-1}{K}} \|\mathbf{V}\|, \end{aligned}$$

and our claim is proved.  $\square$

<sup>4</sup>Similar bounds (i.e.,  $\mathcal{O}(\sqrt{d/K})$ ) hold for other distributions as well, e.g., when the  $\mathbf{U}_k$ 's are uniformly distributed (and independent) in  $[-1, +1]$ .

## A.2 Proof of Theorem 3

We start by observing that  $1 - \eta - \alpha_t \beta \sqrt{\frac{3d-1}{K}} < 0$  since  $\eta \geq 1$ . The definition of  $R_t$  and (18) give  $R_t \leq (\eta + \alpha_t \beta \sqrt{(3d-1)/K}) \triangleq \tilde{R}_t$ , and

$$\mathbb{E}[\delta_T | \mathcal{E}_{\delta_{t_0}}] \leq \left( \frac{2L}{n} \Gamma_K^d + \mu \beta (3+d)^{3/2} \right) \sum_{t=t_0+1}^T \alpha_t \prod_{j=t+1}^T \tilde{R}_j. \quad (28)$$

Recall that  $\eta = 1 + \beta \alpha_t$  for general (nonconvex) losses (see [1]). Assuming that  $\alpha_t \leq C/t \Gamma_K^d$  for all  $t \leq T$ , we have

$$\begin{aligned} \mathbb{E}[\delta_T | \mathcal{E}_{\delta_{t_0}}] &\leq \left( \frac{2L}{n} \Gamma_K^d + \mu \beta (3+d)^{3/2} \right) \sum_{t=t_0+1}^T \alpha_t \prod_{j=t+1}^T (1 + \alpha_j \beta \Gamma_K^d) \\ &\leq \frac{C}{\Gamma_K^d} \left( \frac{2L}{n} \Gamma_K^d + \mu \beta (3+d)^{3/2} \right) \sum_{t=t_0+1}^T \frac{1}{t} \prod_{j=t+1}^T \left( 1 + \frac{C\beta}{j} \right) \\ &\leq \frac{C}{\Gamma_K^d} \left( \frac{2L}{n} \Gamma_K^d + \mu \beta (3+d)^{3/2} \right) \sum_{t=t_0+1}^T \frac{1}{t} \prod_{j=t+1}^T \exp\left(\frac{C\beta}{j}\right) \end{aligned} \quad (29)$$

$$\leq \frac{C(eT)^{\beta C}}{\Gamma_K^d} \left( \frac{2L}{n} \Gamma_K^d + \mu \beta (3+d)^{3/2} \right) \sum_{t=t_0+1}^T \frac{1}{t} \frac{1}{(t+1)^{\beta C}} \quad (30)$$

$$\leq \underbrace{\beta^{-1} (\Gamma_K^d)^{-1} \left( \frac{2L}{n} \Gamma_K^d + \mu \beta (3+d)^{3/2} \right)}_D \left( \left( \frac{eT}{t_0} \right)^{\beta C} - e^{\beta C} \right). \quad (31)$$

In the above, the inequality  $1 + x \leq e^x$  gives (29), inequality (30) follows from the inequality  $\sum_{j=t+1}^T 1/j \leq \log T - \log(t+1) + 1$ , and inequality (31) comes from the next inequality and integral evaluation  $\sum_{t=t_0+1}^T t^{-\beta C - 1} \leq \int_{t=t_0}^T x^{-\beta C - 1} dx = (\beta C)^{-1} (t_0^{-\beta C} - T^{-\beta C})$ . We define  $q \triangleq \beta C$  and find the value of  $t_0$  that minimizes the right part of [75, Lemma 3.11]<sup>5</sup>

$$\mathbb{E} [|f(W_T, z) - f(W'_T, z)|] \leq \frac{t_0}{n} \sup_{w, z} f(w, z) + L \mathbb{E}[\delta_T | \mathcal{E}_{\delta_{t_0}}] \leq \frac{t_0}{n} + LD \left( \left( \frac{eT}{t_0} \right)^q - e^q \right), \quad (32)$$

which is  $t_0^* = \min\{(qnLD)^{1/(q+1)} (eT)^{q/(q+1)}, T\}$ . Then (32) gives

$$\begin{aligned} &\mathbb{E} [|f(W_T, z) - f(W'_T, z)|] \\ &\leq \max \left\{ \frac{(qnLD)^{\frac{1}{q+1}} (eT)^{\frac{q}{q+1}}}{n}, \frac{1+1/q}{n} (qnLD)^{\frac{1}{q+1}} (eT)^{\frac{q}{q+1}} - LDe^q \right\}. \end{aligned} \quad (33)$$

Choosing  $\mu \leq cL\Gamma_K^d/n\beta(3+d)^{3/2}$  for some  $c > 0$  in (33) proves our claim.  $\square$

## A.3 Proof of Corollary 4

Denote by  $W_0(\cdot)$  the Lambert function [76]. Through Theorem 3 and by replacing  $C$  with  $C\Gamma_K^d$  to recover the required learning rate, the generalization error is bounded as

$$\begin{aligned} &\epsilon_{\text{gen}} \\ &\leq \frac{1 + (\beta C \Gamma_K^d)^{-1}}{n} ((2+c)CL^2)^{\frac{1}{1+\beta C \Gamma_K^d}} (\Gamma_K^d)^{\frac{1}{1+\beta C \Gamma_K^d}} (eT)^{\frac{\beta C \Gamma_K^d}{\beta C \Gamma_K^d + 1}} \end{aligned}$$

<sup>5</sup> [75, Lemma 3.11] applies to the ZoSS update rule (6) similar to SGD for nonnegative and  $L$ -Lipschitz losses. Note that  $\mathbb{P}(\mathcal{I} \leq t_0) \leq t_0/n$ ,  $t_0 \in \{0, \dots, T\}$ , and (32) comes from the Lipschitz assumption on the loss as  $\mathbb{E} [|f(W_T, z) - f(W'_T, z)|] \leq \mathbb{P}(\mathcal{I} \leq t_0) \mathbb{E} [|f(W_T, z) - f(W'_T, z)| | \mathcal{E}_{\delta_{t_0}}^c] + L \mathbb{E}[\delta_T | \mathcal{E}_{\delta_{t_0}}]$ .

$$\leq \frac{1 + (\beta C \Gamma_K^d)^{-1}}{n} ((2+c)CL^2)^{\frac{1}{1+\beta C \Gamma_K^d}} \left( \frac{1}{\beta C W_0 \left( \frac{1}{\beta C e} \right)} \right)^{\frac{1}{1+1/W_0 \left( \frac{1}{\beta C e} \right)}} (eT)^{\frac{\beta C \Gamma_K^d}{\beta C \Gamma_K^d + 1}} \quad (34)$$

$$\leq \frac{1 + (\beta C \Gamma_K^d)^{-1}}{n} ((2+c)CL^2)^{\frac{1}{1+\beta C \Gamma_K^d}} \left( \frac{1}{W_0(1/e)} \right)^{\frac{1}{1+1/W_0 \left( \frac{1}{e} \right)}} \max\{1, (\beta C)^{-1}\} (eT)^{\frac{\beta C \Gamma_K^d}{\beta C \Gamma_K^d + 1}}$$

$$\leq \frac{3}{2} \frac{1 + (\beta C \Gamma_K^d)^{-1}}{n} ((2+c)CL^2)^{\frac{1}{1+\beta C \Gamma_K^d}} \max\{1, (\beta C)^{-1}\} (eT)^{\frac{\beta C \Gamma_K^d}{\beta C \Gamma_K^d + 1}} \quad (35)$$

$$\leq \frac{3}{2} \frac{1 + (\beta C)^{-1}}{n} ((2+c)CL^2)^{\frac{1}{1+\beta C \Gamma_K^d}} \max\{1, (\beta C)^{-1}\} (eT)^{\frac{\beta C \Gamma_K^d}{\beta C \Gamma_K^d + 1}} \quad (36)$$

$$\leq \frac{3}{2} \frac{1 + (\beta C)^{-1}}{n} \max\{1, (2+c)CL^2\} \max\{1, (\beta C)^{-1}\} (eT)^{\frac{\beta C \Gamma_K^d}{\beta C \Gamma_K^d + 1}} \quad (37)$$

$$\leq \frac{3}{2} \frac{(1 + (\beta C)^{-1})^2}{n} (1 + (2+c)CL^2) (eT)^{\frac{\beta C \Gamma_K^d}{\beta C \Gamma_K^d + 1}}$$

$$\leq (1 + (\beta C)^{-1})^2 (1 + (2+c)CL^2) \frac{3Te}{2n}, \quad (38)$$

the maximization of  $x^{1/(1+x\beta C)}$  gives (34), we find (35) by maximizing the term  $(\beta C)^{-1/(1+1/W_0(1/x))}$ , and  $W_0(1/x)^{-1/(1+1/W_0(1/x))}$ , and by applying the inequality  $W_0(1/e)^{-1/(1+1/W_0(1/x))} \leq 3/2$ . Inequality (36) holds since  $\Gamma_K^d \geq 1$ , we find (37) by maximizing the function  $((2+c)CL^2)^{1/(1+\beta Cx)}$  for both cases  $((2+c)CL^2) < 1$  and  $((2+c)CL^2) \geq 1$ . Finally, (38) holds for any value of  $d \in \mathbb{N}$  and  $K \in \mathbb{N}$  and gives the bound of the corollary.  $\square$

#### A.4 Proof of Theorem 5

We start by proving the first case of the Theorem for both convex and nonconvex loss.

**Proof of Theorem 5, First Case:** Let  $\mathcal{C}$  denote the set of convex loss functions. Under the assumption  $\alpha_t \leq C'/T$ , and  $\mu \leq cL\Gamma_K^d/(n\beta(3+d)^{3/2})$  Lemma 2 (nonconvex loss) and Lemma 11 (convex loss) give

$$\begin{aligned} & \mathbb{E}[\delta_T | \mathcal{E}_{\delta_0}] \\ & \leq \frac{(2+c)L\Gamma_K^d}{n} \sum_{t=1}^T \frac{C'}{T} \prod_{j=t+1}^T \left( 1 + \frac{\beta C'}{T} \left( \mathbf{1}_{f(\cdot) \notin \mathcal{C}} + \sqrt{\frac{3d-1}{K}} \right) \right) \\ & = \frac{(2+c)L\Gamma_K^d}{Tn} \sum_{t=1}^T \left( 1 + \frac{\beta C'}{T} \left( \mathbf{1}_{f(\cdot) \notin \mathcal{C}} + \sqrt{\frac{3d-1}{K}} \right) \right)^{T-t} \\ & = \frac{(2+c)L\Gamma_K^d}{Tn} \left( 1 + \frac{\beta C'}{T} \left( \mathbf{1}_{f(\cdot) \notin \mathcal{C}} + \sqrt{\frac{3d-1}{K}} \right) \right)^T \sum_{t=1}^T \left( 1 + \frac{\beta C'}{T} \left( \mathbf{1}_{f(\cdot) \notin \mathcal{C}} + \sqrt{\frac{3d-1}{K}} \right) \right)^{-t} \\ & = \frac{(2+c)L\Gamma_K^d}{Tn} \frac{\left( 1 + \frac{\beta C'}{T} \left( \mathbf{1}_{f(\cdot) \notin \mathcal{C}} + \sqrt{\frac{3d-1}{K}} \right) \right)^T - 1}{\left( 1 + \frac{\beta C'}{T} \left( \mathbf{1}_{f(\cdot) \notin \mathcal{C}} + \sqrt{\frac{3d-1}{K}} \right) \right) - 1} \\ & = \frac{(2+c)L\Gamma_K^d}{n} \frac{\left( 1 + \frac{\beta C'}{T} \left( \mathbf{1}_{f(\cdot) \notin \mathcal{C}} + \sqrt{\frac{3d-1}{K}} \right) \right)^T - 1}{\beta \left( \mathbf{1}_{f(\cdot) \notin \mathcal{C}} + \sqrt{\frac{3d-1}{K}} \right)} \end{aligned}$$

$$\leq \frac{(2+c)L\Gamma_K^d}{n} \frac{\exp\left(\beta C' \left(\mathbf{1}_{f(\cdot) \notin \mathcal{C}} + \sqrt{\frac{3d-1}{K}}\right)\right) - 1}{\beta \left(\mathbf{1}_{f(\cdot) \notin \mathcal{C}} + \sqrt{\frac{3d-1}{K}}\right)}.$$

If the loss is convex ( $f(\cdot) \in \mathcal{C}$ ) and  $\alpha_t \leq C'/T \leq 2/\beta$ , the last display under the choice

$$C' = \frac{\log(1 + C\beta\sqrt{\frac{3d-1}{K}}/\Gamma_K^d)}{\beta\sqrt{\frac{3d-1}{K}}} \quad (39)$$

gives

$$\mathbb{E}[\delta_T | \mathcal{E}_{\delta_0}] \leq \frac{(2+c)L\Gamma_K^d}{n} \frac{\exp\left(\beta C' \sqrt{\frac{3d-1}{K}}\right) - 1}{\beta\sqrt{\frac{3d-1}{K}}} \leq \frac{(2+c)CL}{n}. \quad (40)$$

If the loss is nonconvex ( $f(\cdot) \notin \mathcal{C}$ ) and  $\alpha_t \leq C''/T$ , then by choosing

$$C'' = \frac{\log(1 + C\beta)}{\beta\Gamma_K^d}, \quad (41)$$

we find

$$\mathbb{E}[\delta_T | \mathcal{E}_{\delta_0}] \leq \frac{(2+c)L\Gamma_K^d}{n} \frac{\exp(\beta C'' \Gamma_K^d) - 1}{\beta\Gamma_K^d} \leq \frac{(2+c)CL}{n}. \quad (42)$$

The Lipschitz assumption  $\mathbb{E}[|f(W_T, z) - f(W'_T, z)|] \leq L\mathbb{E}[\delta_T] = L\mathbb{E}[\delta_T | \mathcal{E}_{\delta_0}]$  (as a consequence of  $\mathbb{P}(\mathcal{I} \leq 0) = \mathbb{P}(\delta_0 > 0) = 0$ ) completes the proof for the first case of the theorem.

**Proof of Theorem 5, Second Case:** Lemma 2 (nonconvex loss) under the choice  $t_0 = 0$  gives

$$\mathbb{E}[\delta_T | \mathcal{E}_{\delta_0}] \leq \left(\frac{2L}{n}\Gamma_K^d + \mu\beta(3+d)^{3/2}\right) \sum_{t=1}^T \alpha_t \prod_{j=t+1}^T \left(1 + \beta\alpha_j \left(1 + \sqrt{\frac{3d-1}{K}}\right)\right). \quad (43)$$

Under the assumption  $\alpha_t \leq C/(T\Gamma_K^d)$ , and  $\mu \leq cL\Gamma_K^d/(n\beta(3+d)^{3/2})$  we find

$$\begin{aligned} & \mathbb{E}[\delta_T | \mathcal{E}_{\delta_0}] \\ & \leq (2+c)L \frac{\Gamma_K^d}{n} \sum_{t=1}^T \frac{C}{T\Gamma_K^d} \prod_{j=t+1}^T \left(1 + \frac{C\beta}{T}\right) \\ & = (2+c)L \frac{\Gamma_K^d}{n} \frac{C}{T\Gamma_K^d} \sum_{t=1}^T \left(1 + \frac{C\beta}{T}\right)^{T-t} \\ & = (2+c)L \frac{\Gamma_K^d}{n} \frac{C \left(1 + \frac{C\beta}{T}\right)^T}{T\Gamma_K^d} \sum_{t=1}^T \left(1 + \frac{C\beta}{T}\right)^{-t} \\ & = \frac{(2+c)L}{n} \frac{C \left(1 + \frac{C\beta}{T}\right)^T - 1}{T \left(1 + \frac{C\beta}{T}\right) - 1} \\ & = \frac{(2+c)L}{n} \frac{\left(1 + \frac{C\beta}{T}\right)^T - 1}{\beta}. \end{aligned} \quad (44)$$

The Lipschitz assumption  $\mathbb{E}[|f(W_T, z) - f(W'_T, z)|] \leq L\mathbb{E}[\delta_T] = L\mathbb{E}[\delta_T | \mathcal{E}_{\delta_0}]$  (as a consequence of  $\mathbb{P}(\mathcal{I} \leq 0) = \mathbb{P}(\delta_0 > 0) = 0$ ) completes the proof.  $\square$

## A.5 Proof of Theorem 6

Under the assumptions  $\mu \leq cL\Gamma_K^d/(n\beta(3+d)^{3/2})$  and  $\alpha_t \leq C/t\Gamma_K^d$ , Lemma 2 gives

$$\begin{aligned}
& \mathbb{E}[\delta_T | \mathcal{E}_{\delta_0}] \\
& \leq \left( \frac{2L}{n} \Gamma_K^d + \mu\beta(3+d)^{3/2} \right) \sum_{t=1}^T \alpha_t \prod_{j=t+1}^T \left( 1 + \beta\alpha_j \left( 1 + \sqrt{\frac{3d-1}{K}} \right) \right) \\
& \leq \frac{\Gamma_K^d}{n} (2+c)L \sum_{t=1}^T \frac{C}{t\Gamma_K^d} \prod_{j=t+1}^T \left( 1 + \frac{C\beta}{j} \right) \\
& \leq \frac{(2+c)L}{n} \sum_{t=1}^T \frac{C}{t} \exp \left( \sum_{j=t+1}^T \frac{C\beta}{j} \right) \\
& \leq \frac{(2+c)L}{n} \sum_{t=1}^T \frac{C}{t} \exp \left( C\beta \log \left( \frac{eT}{t+1} \right) \right) \\
& = \frac{C(2+c)L}{n} \sum_{t=1}^T \frac{1}{t} \left( \frac{eT}{t+1} \right)^{C\beta} \\
& \leq \frac{C(eT)^{C\beta}(2+c)L}{n} \sum_{t=1}^T \frac{1}{t^{C\beta+1}} \\
& \leq \frac{(eT)^{C\beta}(2+c)L}{n} \min \left\{ \frac{C\beta+1}{\beta}, C \log(eT) \right\}. \tag{45}
\end{aligned}$$

The last inequality holds because of the inequalities  $\sum_{t=1}^T t^{-C\beta-1} \leq \sum_{t=1}^{\infty} t^{-C\beta-1} \leq (C\beta+1)/C\beta$  and  $\sum_{t=1}^T t^{-C\beta-1} \leq \sum_{t=1}^T 1/t \leq \log(eT)$ . Then the inequality  $\mathbb{E}[|f(W_T, z) - f(W'_T, z)|] \leq L\mathbb{E}[\delta_T] = L\mathbb{E}[\delta_T | \mathcal{E}_{\delta_0}]$  (as a consequence of  $\mathbb{P}(Z \leq 0) = \mathbb{P}(\delta_0 > 0) = 0$ ) completes the proof.  $\square$

## B Complementary Results

In this Section we provide complementary results and the corresponding proofs. The next result provides the equivalent bound of Lemma 2 for convex losses.

**Lemma 11 (ZoSS Stability Convex Loss)** *Assume that the loss function  $f(\cdot, z)$  is  $L$ -Lipschitz, convex and  $\beta$ -smooth for all  $z \in \mathcal{Z}$ . Consider the ZO-SM algorithm (6) with parameters estimates  $W_T$  and  $W'_T$  for all the data-sets  $S, S'$  respectively (that differ in exactly one entry). Then the discrepancy  $\delta_T \triangleq \|W_T - W'_T\|$  under the event  $\mathcal{E}_{\delta_{t_0}}$  satisfies the following inequality,*

$$\mathbb{E}[\delta_T | \mathcal{E}_{\delta_{t_0}}] \leq \left( \frac{2L}{n} \Gamma_K^d + \mu\beta(3+d)^{3/2} \right) \sum_{t=t_0+1}^T \alpha_t \prod_{j=t+1}^T \left( 1 + \beta\alpha_j \sqrt{\frac{3d-1}{K}} \right). \tag{46}$$

We prove Lemma 11 in parallel with Lemma 2 in Section 4.1 of the main part of the paper.

## C ZoSS with Mini-Batch (Section 5)

For the stability analysis of mini-batch ZoSS, we similarly consider the sequences  $S, S'$  that differ in one example. At each time  $t$  we sample a batch  $J_t \subset S$  ( $J'_t \subset S'$ ) (and batch size  $m \triangleq |J_t| = |J'_t|$ ) with replacement, or by considering random permutation of the samples and then sample the first  $m$  examples. As a consequence in both cases  $\mathbb{P}(J_t \neq J'_t) = m/n$ . Under the event  $\{J_t \neq J'_t\}$ , the sets  $J_t, J'_t$  differ in one example  $z_{i^*} \neq z'_{i^*}$  (for some  $i^*$  without loss of generality), and  $z_i = z'_i$  for any  $z_i \in J_t$  and  $i \in \{1, \dots, m\} \setminus \{i^*\}$ . Let  $U_{k,i}^t \sim \mathcal{N}(0, I_d)$  be independent for all  $k \in \{1, 2, \dots, K\}$ ,  $i \in \{1, 2, \dots, m\}$  and  $t \leq T$  and  $\mu \in \mathbb{R}^+$ . Recall the definition of the smoothed approximation and

update rule mapping of mini-batch ZoSS,

$$\Delta f_{w,J_t}^{K,\mu} \equiv \Delta f_{w,J_t}^{K,\mu,U^t} \triangleq \frac{1}{mK} \sum_{i=1}^m \sum_{k=1}^K \frac{f(w + \mu U_{k,i}^t, z_{J_t,i}) - f(w, z_{J_t,i})}{\mu} U_{k,i}^t, \quad (47)$$

$$\tilde{G}_{J_t}(w) \triangleq w - \alpha_t \Delta f_{w,J_t}^{K,\mu}, \quad \tilde{G}'_{J_t}(w) \triangleq w - \alpha_t \Delta f_{w,J_t}^{K,\mu}. \quad (48)$$

For the stability error decomposition, we define the gradient based mappings  $G_{J_t}(\cdot)$  and  $G'_{J_t}(\cdot)$  as

$$G_{J_t}(w) \triangleq w - \alpha_t \nabla f_{w,J_t}, \quad G'_{J_t}(w) \triangleq w - \alpha_t \nabla f_{w,J_t}, \quad \text{and} \quad \nabla f_{w,J_t} \triangleq \frac{1}{m} \sum_{z \in J_t} \nabla f(w, z) \quad (49)$$

the iterate stability error of the mini-batch ZoSS  $\tilde{G}_{J_t}(w) - \tilde{G}'_{J_t}(w')$  at time  $t$  and similarly to (5), we show that

$$\tilde{G}_{J_t}(w) - \tilde{G}'_{J_t}(w') \propto \underbrace{G_{J_t}(w) - G'_{J_t}(w')}_{\epsilon_{\text{GBstab}}^m} + \underbrace{[\nabla f_{w,J_t} - \Delta f_{w,J_t}^{K,\mu}] + [\nabla f_{w',J_t} - \Delta f_{w',J_t}^{K,\mu}]}_{\epsilon_{\text{est}}^m}. \quad (50)$$

For the mini-batch case the derivation of the stability differs to that of (5) ( $m = 1$ ). To analyze the error term  $\epsilon_{\text{GBstab}}^m$  in the mini batch case, we derive (for the proof see Appendix, Section C.2) and apply the Mini-Batch SGD Growth Recursion for the mappings  $G_{J_t}(\cdot), G'_{J_t}(\cdot)$ , that is an extension of [1, Lemma 2.4] and describes the growth recursion property of the SGD algorithm with mini batch.

**Lemma 12 (Mini-Batch SGD Growth Recursion)** *Fix arbitrary sequences of updates  $\{G_{J_t}\}_{t=1}^T$  and  $\{G'_{J_t}\}_{t=1}^T$ . Let  $w_0 = w'_0$  be the starting point,  $w_{t+1} = G_{J_t}(w_t)$  and  $w'_{t+1} = G'_{J_t}(w'_t)$  for any  $t \in \{1, \dots, T\}$ . Then for any  $t \geq 0$  the following recursion holds*

$$\|G_{J_t}(w_t) - G'_{J_t}(w'_t)\| \leq \begin{cases} (1 + \beta\alpha_t) \|w_t - w'_t\| & \text{if } G_{J_t}(\cdot) = G'_{J_t}(\cdot) \\ (1 + \frac{m-1}{m}\beta\alpha_t) \|w_t - w'_t\| + \frac{2}{m}L\alpha_t & \text{if } G_{J_t}(\cdot) \neq G'_{J_t}(\cdot). \end{cases} \quad (51)$$

The error  $\epsilon_{\text{GBstab}}^m$  depends on the batch size  $m$  at the event of different batch selection  $\{J_t \neq J'_t\}$  as appears in Lemma 12. Additionally, the error  $\epsilon_{\text{est}}^m$  breaks down into the errors  $\epsilon_\mu, \epsilon_{d/K}^m$ . Although  $\epsilon_\mu$  is independent of  $m$ ,  $\epsilon_\mu \leq \mu\beta\mathbb{E}[\|U\|^3]$  ( $U \in \mathbb{R}^d$  is standard normal),  $\epsilon_{d/K}^m$  depends on the batch size  $m$  similarly to gradient based stability error  $\epsilon_{\text{GBstab}}^m$ . If the randomized algorithm (at time  $t$ ) selects  $J_t \neq J'_t$  then  $\epsilon_{d/K}^m \leq 2\beta\alpha_t\sqrt{d/K}[(m-1)\|w - w'\| + 2L]/m$ , else  $\epsilon_{d/K}^m \leq 4\beta\alpha_t\|w - w'\|\sqrt{d/K}$ . We provide a unified representation of the stability error  $\tilde{G}_{J_t}(w) - \tilde{G}'_{J_t}(w')$  in the Section (Mini-Batch ZoSS Growth Recursion, Lemma 13).

## C.1 Results for the ZoSS with Mini-Batch

We start by providing the growth recursion lemma for the ZoSS with mini batch.

**Lemma 13 (Mini-Batch ZoSS Growth Recursion)** *Consider the sequences of updates  $\{\tilde{G}_{J_t}\}_{t=1}^T$  and  $\{\tilde{G}'_{J_t}\}_{t=1}^T$  and  $\mu \leq cL\Gamma_K^d/(n\beta(3+d)^{3/2})$ . Let  $w_0 = w'_0$  be the starting point,  $w_{t+1} = \tilde{G}_{J_t}(w_t)$  and  $w'_{t+1} = \tilde{G}'_{J_t}(w'_t)$  for any  $t \in \{1, \dots, T\}$ . Then for any  $w_t, w'_t \in \mathbb{R}^d$  and  $t \geq 0$  the following recursion holds*

$$\mathbb{E}[\|\tilde{G}_{J_t}(w_t) - \tilde{G}'_{J_t}(w'_t)\|] \leq \begin{cases} (1 + \beta\alpha_t\Gamma_K^d) \delta_t + \frac{cL\alpha_t}{n}\Gamma_K^d & \text{if } \tilde{G}_{J_t}(\cdot) = \tilde{G}'_{J_t}(\cdot) \\ (1 + \frac{m-1}{m}\beta\alpha_t\Gamma_K^d) \delta_t + \frac{2L\alpha_t}{m}\Gamma_K^d + \frac{cL\alpha_t}{n}\Gamma_K^d & \text{if } \tilde{G}_{J_t}(\cdot) \neq \tilde{G}'_{J_t}(\cdot). \end{cases}$$

Our next result provides a stability guarantee on the difference of the mini-batch ZoSS outputs  $W_T, W'_T$ , that holds for any batch size  $m$ .

**Theorem 14 (Stability of ZoSS with Mini Batch | Nonconvex Loss)** *Assume that the loss function  $f(\cdot, z)$  is  $L$ -Lipschitz and  $\beta$ -smooth for all  $z \in \mathcal{Z}$ . Consider the ZoSS with mini batch of size  $m \in \{1, \dots, n\}$ , initial state  $W_0 = W'_0$ , iterates  $W_t = \tilde{G}_{J_t}(W_t)$ ,  $W'_t = \tilde{G}'_{J_t}(W'_t)$  for  $t > 0$ , and with final-iterate estimates  $W_T$  and  $W'_T$  corresponding to the data-sets  $S, S'$ , respectively (that differ*

in exactly one entry). Then the discrepancy  $\delta_T \triangleq \|W_T - W'_T\|$  under the event  $\mathcal{E}_{\delta_{t_0}}$  and the choice  $\mu \leq cL\Gamma_K^d/(n\beta(3+d)^{3/2})$  satisfies the inequality

$$\mathbb{E}[\delta_T | \mathcal{E}_{\delta_{t_0}}] \leq \frac{(2+c)L\Gamma_K^d}{n} \sum_{t=t_0+1}^T \alpha_t \prod_{j=t+1}^T \left(1 + \beta\alpha_j \Gamma_K^d \left(1 - \frac{1}{n}\right)\right). \quad (52)$$

We prove Theorem 14 in Appendix, Section C.3. Note that<sup>6</sup>  $\mathbb{P}(\mathcal{I} \leq t_0) = 1 - (1 - m/n)^{t_0}$ . By setting the free parameter  $t_0 = 0$  and through the Lipschitz assumption we find the stability bound of the loss as  $\mathbb{E}[|f(W_T, z) - f(W'_T, z)|] \leq L\mathbb{E}[\delta_T] = L\mathbb{E}[\delta_T | \mathcal{E}_{\delta_0}]$ . The last inequality and the solution of the recursion in (52) show that Theorem 5 and Theorem 6 hold for the ZoSS algorithm with mini batch, and any batch size  $m \in \{1, \dots, n\}$  as well.

## C.2 Proof of Lemma 12

Under the assumption of nonconvex losses we find the first part of the statement as

$$\begin{aligned} \|G_{J_t}(w_t) - G_{J_t}(w'_t)\| &\leq \|w_t - w'_t\| + \frac{\alpha_t}{m} \left\| \sum_{z \in J_t} \nabla_w f(w, z)|_{w=w_t} - \sum_{z \in J_t} \nabla_w f(w, z)|_{w=w'_t} \right\| \\ &\leq \|w_t - w'_t\| + \frac{\alpha_t}{m} \sum_{z \in J_t} \left\| \nabla_w f(w, z)|_{w=w_t} - \nabla_w f(w, z)|_{w=w'_t} \right\| \\ &\leq \|w_t - w'_t\| + \frac{\alpha_t}{m} \sum_{z \in J_t} \beta \|w_t - w'_t\| \\ &= (1 + \beta\alpha_t) \|w_t - w'_t\|. \end{aligned} \quad (53)$$

Further define  $J_t^{-i^*} \triangleq J_t \setminus \{z_{J_t, i^*}\}$  and  $J'_t{}^{-i^*} \triangleq J'_t \setminus \{z'_{J'_t, i^*}\}$ , and notice that  $J_t^{-i^*} = J'_t{}^{-i^*}$  for any  $t \leq T$  w.p. 1.

$$\begin{aligned} &\|G_{J_t}(w_t) - G'_{J'_t}(w'_t)\| \\ &= \left\| w_t - w'_t - \frac{\alpha_t}{m} \sum_{z \in J_t} \nabla_w f(w, z)|_{w=w_t} + \frac{\alpha_t}{m} \sum_{z' \in J'_t} \nabla_w f(w, z')|_{w=w'_t} \right\| \\ &= \left\| \frac{1}{m} \sum_{z \in J_t^{-i^*}} (w_t - \alpha_t \nabla_w f(w, z)|_{w=w_t}) - \frac{1}{m} \sum_{z' \in J'_t{}^{-i^*}} (w'_t - \alpha_t \nabla_w f(w, z')|_{w=w'_t}) \right. \\ &\quad \left. + \frac{1}{m} (w_t - \alpha_t \nabla_w f(w, z_{J_t, i^*})|_{w=w_t}) - \frac{1}{m} (w'_t - \alpha_t \nabla_w f(w, z'_{J'_t, i^*})|_{w=w'_t}) \right\| \\ &= \left\| \frac{1}{m} \sum_{z \in J_t^{-i^*}} \underbrace{(w_t - \alpha_t \nabla_w f(w, z)|_{w=w_t})}_{G(w_t, z)} - \frac{1}{m} \sum_{z \in J'_t{}^{-i^*}} \underbrace{(w'_t - \alpha_t \nabla_w f(w, z)|_{w=w'_t})}_{G(w'_t, z)} \right. \\ &\quad \left. + \frac{1}{m} \underbrace{(w_t - \alpha_t \nabla_w f(w, z_{J_t, i^*})|_{w=w_t})}_{G(w_t, z_{J_t, i^*})} - \frac{1}{m} \underbrace{(w'_t - \alpha_t \nabla_w f(w, z'_{J'_t, i^*})|_{w=w'_t})}_{G'(w'_t, z'_{J'_t, i^*})} \right\| \\ &= \frac{1}{m} \left\| \sum_{z \in J_t^{-i^*}} (G(w_t, z) - G(w'_t, z)) + G(w_t, z_{J_t, i^*}) - G'(w'_t, z'_{J'_t, i^*}) \right\| \\ &\leq \frac{1}{m} \left\| \sum_{z \in J_t^{-i^*}} (G(w_t, z) - G(w'_t, z)) \right\| + \frac{1}{m} \|G(w_t, z_{J_t, i^*}) - G'(w'_t, z'_{J'_t, i^*})\| \\ &\leq \frac{1}{m} \sum_{z \in J_t^{-i^*}} \|G(w_t, z) - G(w'_t, z)\| + \frac{1}{m} \|G(w_t, z_{J_t, i^*}) - G'(w'_t, z'_{J'_t, i^*})\|. \end{aligned} \quad (54)$$

<sup>6</sup>Under the random selection rule  $\mathbb{P}(\mathcal{I} \leq t_0) = 1 - \mathbb{P}(\cap_{i=1}^{t_0} \{\mathcal{I} \neq i\}) = 1 - \prod_{i=1}^{t_0} \mathbb{P}(\{\mathcal{I} \neq i\})$ .

[1, Lemma 2.4] for nonconvex loss ( $\eta = 1 + \beta\alpha_t$ ) gives

$$\|G(w_t, z) - G(w'_t, z)\| \leq (1 + \beta\alpha_t)\delta_t, \quad (55)$$

$$\|G(w_t, z_{J_t, i^*}) - G'(w'_t, z_{J_t, i^*})\| \leq \delta_t + 2L\alpha_t. \quad (56)$$

By combining the last two together with (54) we find

$$\begin{aligned} \|G_{J_t}(w_t) - G'_{J_t}(w'_t)\| &\leq \frac{1}{m} \sum_{z \in J_t^{-i^*}} (1 + \beta\alpha_t)\delta_t + \frac{1}{m} (\delta_t + 2L\alpha_t) \\ &= \frac{m-1}{m}(1 + \beta\alpha_t)\delta_t + \frac{1}{m} (\delta_t + 2L\alpha_t) \\ &= \left(1 + \frac{m-1}{m}\beta\alpha_t\right) \delta_t + \frac{2}{m}L\alpha_t. \end{aligned} \quad (57)$$

The last gives the second part of the recursion and completes the proof.  $\square$

### C.3 Proof of Lemma 13 and Theorem 14

First we provide the proof of Lemma 13, then we apply Lemma 13 to prove Theorem 14.

**Proof of Lemma 13** Consider the update rules under the event  $\tilde{\mathcal{E}}_t \triangleq \{\tilde{G}_{J_t}(\cdot) \equiv \tilde{G}'_{J_t}(\cdot)\}$  that occurs with probability  $\mathbb{P}(\tilde{\mathcal{E}}_t) = 1 - m/n$  for all  $t \leq T$ . Similarly to (9) we find

$$\begin{aligned} &\tilde{G}_{J_t}(w_t) - \tilde{G}_{J_t}(w'_t) \\ &= \underbrace{w_t - \frac{\alpha_t}{m} \sum_{i=1}^m \nabla_w f(w, z_{J_t, i})|_{w=w_t}}_{G_{J_t}(w_t)} - \underbrace{\left(w'_t - \frac{\alpha_t}{m} \sum_{i=1}^m \nabla_w f(w, z_{J_t, i})|_{w=w'_t}\right)}_{G'_{J_t}(w'_t) \equiv G_{J_t}(w'_t)} \\ &\quad - \frac{\alpha_t}{mK} \sum_{i=1}^m \sum_{k=1}^K \left( \frac{\mu}{2} U_k^T \nabla_w^2 f(w, z_{J_t, i})|_{w=W_{k,t,i}^*} U_{k,i}^t \right) U_{k,i}^t \\ &\quad + \frac{\alpha_t}{mK} \sum_{i=1}^m \sum_{k=1}^K \left( \frac{\mu}{2} U_k^T \nabla_w^2 f(w, z_{J_t, i})|_{w=W_{k,t,i}^\dagger} U_{k,i}^t \right) U_{k,i}^t \\ &\quad - \frac{\alpha_t}{m} \sum_{i=1}^m \left( \frac{1}{K} \sum_{k=1}^K \langle \nabla_w f(w, z_{J_t, i})|_{w=w_t} - \nabla_w f(w, z_{J_t, i})|_{w=w'_t}, U_{k,i}^t \rangle U_{k,i}^t \right. \\ &\quad \left. - \langle \nabla_w f(w, z_{J_t, i})|_{w=w_t} - \nabla_w f(w, z_{J_t, i})|_{w=w'_t} \rangle \right). \end{aligned} \quad (58)$$

Denote by  $\mathbb{E}_{\mathbf{U}_t^{\otimes K \times m}}$  the expectation with respect to product measure of the random vectors  $U_{k,i}^t \sim \mathcal{N}(0, I_d)$  for all  $k \in \{1, 2, \dots, K\}$ ,  $i \in \{1, 2, \dots, m\}$  and fixed  $t \leq T$ . Recall that  $U_{k,i}^t$  are independent for all  $k \in \{1, 2, \dots, K\}$ ,  $i \in \{1, 2, \dots, m\}$  and  $t \leq T$ . Inequality (58) and triangle inequality give

$$\begin{aligned} &\mathbb{E}[\|\tilde{G}_{J_t}(w_t) - \tilde{G}_{J_t}(w'_t)\|] \\ &\leq \|G_{J_t}(w_t) - G_{J_t}(w'_t)\| \\ &\quad + \mathbb{E}_{\mathbf{U}_t^{\otimes K \times m}} \left[ \left\| \frac{\alpha_t}{mK} \sum_{i=1}^m \sum_{k=1}^K \left( \frac{\mu}{2} U_k^T \nabla_w^2 f(w, z_{J_t, i})|_{w=W_{k,t,i}^*} U_{k,i}^t \right) U_{k,i}^t \right\| \right] \\ &\quad + \mathbb{E}_{\mathbf{U}_t^{\otimes K \times m}} \left[ \left\| \frac{\alpha_t}{mK} \sum_{i=1}^m \sum_{k=1}^K \left( \frac{\mu}{2} U_k^T \nabla_w^2 f(w, z_{J_t, i})|_{w=W_{k,t,i}^\dagger} U_{k,i}^t \right) U_{k,i}^t \right\| \right] \\ &\quad + \mathbb{E}_{\mathbf{U}_t^{\otimes K \times m}} \left[ \left\| \frac{\alpha_t}{m} \sum_{i=1}^m \left( \frac{1}{K} \sum_{k=1}^K \langle \nabla_w f(w, z_{J_t, i})|_{w=w_t} - \nabla_w f(w, z_{J_t, i})|_{w=w'_t}, U_{k,i}^t \rangle U_{k,i}^t \right. \right. \right. \end{aligned}$$



$$\begin{aligned}
& - (\nabla_w f(w, z_{J_t, i})|_{w=w_t} - \nabla_w f(w, z_{J_t, i})|_{w=w'_t}) \Big\| \Big\| \\
& \leq \|G_{J_t}(w_t) - G_{J_t}(w'_t)\| \\
& + \mathbb{E}_{\mathbf{U}_t^{\otimes K \times m}} \left[ \left\| \frac{\alpha_t}{mK} \sum_{i=1}^m \sum_{k=1}^K \left( \frac{\mu}{2} U_k^\top \nabla_w^2 f(w, z_{J_t, i})|_{w=W_{k,t,i}^*} U_{k,i}^t \right) U_{k,i}^t \right\| \right] \\
& + \mathbb{E}_{\mathbf{U}_t^{\otimes K \times m}} \left[ \left\| \frac{\alpha_t}{mK} \sum_{i=1}^m \sum_{k=1}^K \left( \frac{\mu}{2} U_k^\top \nabla_w^2 f(w, z_{J_t, i})|_{w=W_{k,t,i}^\dagger} U_{k,i}^t \right) U_{k,i}^t \right\| \right] \\
& + \frac{\alpha_t}{m} \sum_{i=1}^m \mathbb{E}_{\mathbf{U}_{t,i}^{\otimes K}} \left[ \left\| \left( \frac{1}{K} \sum_{k=1}^K \langle \nabla_w f(w, z_{J_t, i})|_{w=w_t} - \nabla_w f(w, z_{J_t, i})|_{w=w'_t}, U_{k,i}^t \rangle U_{k,i}^t \right. \right. \right. \\
& \quad \left. \left. - (\nabla_w f(w, z_{J_t, i})|_{w=w_t} - \nabla_w f(w, z_{J_t, i})|_{w=w'_t}) \right\| \right] \\
& \leq \|G_{J_t}(w_t) - G_{J_t}(w'_t)\| \\
& + \mathbb{E}_{\mathbf{U}_t^{\otimes K \times m}} \left[ \left\| \frac{\alpha_t}{mK} \sum_{i=1}^m \sum_{k=1}^K \left( \frac{\mu}{2} U_k^\top \nabla_w^2 f(w, z_{J_t, i})|_{w=W_{k,t,i}^*} U_{k,i}^t \right) U_{k,i}^t \right\| \right] \\
& + \mathbb{E}_{\mathbf{U}_t^{\otimes K \times m}} \left[ \left\| \frac{\alpha_t}{mK} \sum_{i=1}^m \sum_{k=1}^K \left( \frac{\mu}{2} U_k^\top \nabla_w^2 f(w, z_{J_t, i})|_{w=W_{k,t,i}^\dagger} U_{k,i}^t \right) U_{k,i}^t \right\| \right] \\
& + \frac{\alpha_t}{m} \sum_{i=1}^m \sqrt{\frac{3d-1}{K}} \|\nabla_w f(w, z_{J_t, i})|_{w=w_t} - \nabla_w f(w, z_{J_t, i})|_{w=w'_t}\| \tag{59} \\
& \leq \|G_{J_t}(w_t) - G_{J_t}(w'_t)\| + \frac{2\alpha_t}{mK} \sum_{i=1}^m \sum_{k=1}^K \frac{\mu\beta}{2} \mathbb{E}_{\mathbf{U}_{t,i,k}} [\|U_{k,i}^t\|^3] \\
& + \frac{\alpha_t}{m} \sum_{i=1}^m \sqrt{\frac{3d-1}{K}} \|\nabla_w f(w, z_{J_t, i})|_{w=w_t} - \nabla_w f(w, z_{J_t, i})|_{w=w'_t}\| \tag{60} \\
& \leq (1 + \beta\alpha_t)\delta_t + \frac{2\alpha_t}{mK} \sum_{i=1}^m \sum_{k=1}^K \frac{\mu\beta}{2} \mathbb{E}_{\mathbf{U}_{t,i,k}} [\|U_{k,i}^t\|^3] + \alpha_t \sqrt{\frac{3d-1}{K}} \beta\delta_t \tag{61} \\
& \leq (1 + \beta\alpha_t \Gamma_K^d) \delta_t + \mu\beta\alpha_t(3+d)^{3/2}, \tag{62}
\end{aligned}$$

to find the inequality (59) we applied Lemma 10, inequality (60) comes from the triangle inequality and  $\beta$ -smoothness, to derive the inequality (61) we applied the  $1 + \beta\alpha_t$ -expansive property for the  $G_{J_t}(\cdot)$  mapping (Lemma 12) and the  $\beta$ -smoothness of the loss function, finally the inequality (62) holds since the random vectors  $U_{k,i}^t \sim \mathcal{N}(0, I_d)$  are i.i.d. and  $\mathbb{E}[\|U_{k,i}^t\|] \leq (3+d)^{3/2}$  for all  $k \in \{1, 2, \dots, K\}$ ,  $i \in \{1, 2, \dots, m\}$  and  $t \leq T$ . Under the choice  $\mu \leq cL\Gamma_K^d/(n\beta(3+d)^{3/2})$ , (62) gives the first part the inequality in Lemma 13.

We continue by considering the event  $\tilde{\mathcal{E}}_t^c \triangleq \{G_{J_t}(\cdot) \neq G'_{J_t}(\cdot)\}$ . Recall that  $\tilde{\mathcal{E}}_t^c$  occurs with probability  $\mathbb{P}(\tilde{\mathcal{E}}_t) = m/n$  for all  $t \leq T$ . Under the event  $\tilde{\mathcal{E}}_t^c$  similarly to (13) we derive the difference

$$\begin{aligned}
& \tilde{G}_{J_t}(w_t) - \tilde{G}'_{J_t}(w'_t) \\
& = \underbrace{w_t - \frac{\alpha_t}{m} \sum_{i=1}^m \nabla_w f(w, z_{J_t, i})|_{w=w_t}}_{G_{J_t}(w_t)} - \underbrace{\left( w'_t - \frac{\alpha_t}{m} \sum_{i=1}^m \nabla_w f(w, z'_{J_t, i})|_{w=w'_t} \right)}_{G'_{J_t}(w'_t)} \\
& \quad - \frac{\alpha_t}{mK} \sum_{i=1}^m \sum_{k=1}^K \left( \frac{\mu}{2} U_k^\top \nabla_w^2 f(w, z_{J_t, i})|_{w=W_{k,t,i}^*} U_{k,i}^t \right) U_{k,i}^t
\end{aligned}$$

$$\begin{aligned}
& + \frac{\alpha_t}{mK} \sum_{i=1}^m \sum_{k=1}^K \left( \frac{\mu}{2} U_k^\top \nabla_w^2 f(w, z'_{J'_{t,i}}) |_{w=W_{k,t,i}^\dagger} U_{k,i}^t \right) U_{k,i}^t \\
& - \frac{\alpha_t}{m} \sum_{i=1}^m \left( \frac{1}{K} \sum_{k=1}^K \langle \nabla_w f(w, z_{J_{t,i}}) |_{w=w_t} - \nabla_w f(w, z'_{J'_{t,i}}) |_{w=w'_t}, U_{k,i}^t \rangle U_{k,i}^t \right. \\
& \quad \left. - (\nabla_w f(w, z_{J_{t,i}}) |_{w=w_t} - \nabla_w f(w, z'_{J'_{t,i}}) |_{w=w'_t}) \right). \tag{63}
\end{aligned}$$

By using the triangle inequality and Lemma 10 we get

$$\begin{aligned}
& \mathbb{E}[\|\tilde{G}_{J_t}(w_t) - \tilde{G}'_{J'_t}(w'_t)\|] \\
& \leq \|G_{J_t}(w_t) - G'_{J'_t}(w'_t)\| \\
& \quad + \mathbb{E}_{\mathbf{U}_t^{\otimes K \times m}} \left[ \left\| \frac{\alpha_t}{mK} \sum_{i=1}^m \sum_{k=1}^K \left( \frac{\mu}{2} U_k^\top \nabla_w^2 f(w, z_{J_{t,i}}) |_{w=W_{k,t,i}^*} U_{k,i}^t \right) U_{k,i}^t \right\| \right] \\
& \quad + \mathbb{E}_{\mathbf{U}_t^{\otimes K \times m}} \left[ \left\| \frac{\alpha_t}{mK} \sum_{i=1}^m \sum_{k=1}^K \left( \frac{\mu}{2} U_k^\top \nabla_w^2 f(w, z'_{J'_{t,i}}) |_{w=W_{k,t,i}^\dagger} U_{k,i}^t \right) U_{k,i}^t \right\| \right] \\
& \quad + \mathbb{E}_{\mathbf{U}_t^{\otimes K \times m}} \left[ \left\| \frac{\alpha_t}{m} \sum_{i=1}^m \left( \frac{1}{K} \sum_{k=1}^K \langle \nabla_w f(w, z_{J_{t,i}}) |_{w=w_t} - \nabla_w f(w, z'_{J'_{t,i}}) |_{w=w'_t}, U_{k,i}^t \rangle U_{k,i}^t \right. \right. \right. \\
& \quad \quad \left. \left. - (\nabla_w f(w, z_{J_{t,i}}) |_{w=w_t} - \nabla_w f(w, z'_{J'_{t,i}}) |_{w=w'_t}) \right) \right\| \right] \\
& \leq \|G_{J_t}(w_t) - G'_{J'_t}(w'_t)\| + \frac{2\alpha_t}{mK} \sum_{i=1}^m \sum_{k=1}^K \frac{\mu\beta}{2} \mathbb{E}_{\mathbf{U}_{t,i,k}} [\|U_{k,i}^t\|^3] \\
& \quad + \frac{\alpha_t}{m} \sum_{i=1}^m \mathbb{E}_{\mathbf{U}_{t,i}^{\otimes K}} \left[ \left\| \left( \frac{1}{K} \sum_{k=1}^K \langle \nabla_w f(w, z_{J_{t,i}}) |_{w=w_t} - \nabla_w f(w, z'_{J'_{t,i}}) |_{w=w'_t}, U_{k,i}^t \rangle U_{k,i}^t \right. \right. \right. \\
& \quad \quad \left. \left. - (\nabla_w f(w, z_{J_{t,i}}) |_{w=w_t} - \nabla_w f(w, z'_{J'_{t,i}}) |_{w=w'_t}) \right) \right\| \right] \\
& \leq \|G_{J_t}(w_t) - G'_{J'_t}(w'_t)\| + \frac{2\alpha_t}{mK} \sum_{i=1}^m \sum_{k=1}^K \frac{\mu\beta}{2} \mathbb{E}_{\mathbf{U}_{t,i,k}} [\|U_{k,i}^t\|^3] \\
& \quad + \frac{\alpha_t}{m} \sum_{i=1}^m \sqrt{\frac{3d-1}{K}} \|\nabla_w f(w, z_{J_{t,i}}) |_{w=w_t} - \nabla_w f(w, z'_{J'_{t,i}}) |_{w=w'_t}\| \tag{64} \\
& = \|G_{J_t}(w_t) - G'_{J'_t}(w'_t)\| + \frac{2\alpha_t}{mK} \sum_{i=1}^m \sum_{k=1}^K \frac{\mu\beta}{2} \mathbb{E}_{\mathbf{U}_{t,i,k}} [\|U_{k,i}^t\|^3] \\
& \quad + \sqrt{\frac{3d-1}{K}} \frac{\alpha_t}{m} \sum_{i=1, i \neq i^*}^m \|\nabla_w f(w, z_{J_{t,i}}) |_{w=w_t} - \nabla_w f(w, z'_{J'_{t,i}}) |_{w=w'_t}\| \\
& \quad + \sqrt{\frac{3d-1}{K}} \frac{\alpha_t}{m} \|\nabla_w f(w, z_{J_{t,i^*}}) |_{w=w_t} - \nabla_w f(w, z'_{J'_{t,i^*}}) |_{w=w'_t}\| \\
& = \|G_{J_t}(w_t) - G'_{J'_t}(w'_t)\| + \frac{2\alpha_t}{mK} \sum_{i=1}^m \sum_{k=1}^K \frac{\mu\beta}{2} \mathbb{E}_{\mathbf{U}_{t,i,k}} [\|U_{k,i}^t\|^3] \\
& \quad + \sqrt{\frac{3d-1}{K}} \frac{\alpha_t}{m} \sum_{i=1, i \neq i^*}^m \|\nabla_w f(w, z_{J_{t,i}}) |_{w=w_t} - \nabla_w f(w, z_{J_{t,i}}) |_{w=w'_t}\|
\end{aligned}$$

$$+ \sqrt{\frac{3d-1}{K}} \frac{\alpha_t}{m} \|\nabla_w f(w, z_{J_t, i^*})|_{w=w_t} - \nabla_w f(w, z'_{J_t, i^*})|_{w=w'_t}\| \quad (65)$$

$$\leq \|G_{J_t}(w_t) - G'_{J_t}(w'_t)\| + \frac{2\alpha_t}{mK} \sum_{i=1}^m \sum_{k=1}^K \frac{\mu\beta}{2} \mathbb{E}_{\mathcal{U}_{t,i,k}} [\|U_{k,i}^t\|^3] \\ + \sqrt{\frac{3d-1}{K}} \frac{\alpha_t}{m} (m-1)\beta\delta_t + \sqrt{\frac{3d-1}{K}} \frac{\alpha_t}{m} 2L \quad (66)$$

$$\leq \left(1 + \frac{m-1}{m}\beta\alpha_t\right) \delta_t + \frac{2}{m}L\alpha_t + \mu\beta\alpha_t(3+d)^{3/2} \\ + \sqrt{\frac{3d-1}{K}} \frac{\alpha_t}{m} (m-1)\beta\delta_t + \sqrt{\frac{3d-1}{K}} \frac{\alpha_t}{m} 2L \quad (67)$$

$$= \left(1 + \frac{m-1}{m}\beta\alpha_t\Gamma_K^d\right) \delta_t + \frac{2L\alpha_t}{m}\Gamma_K^d + \mu\beta\alpha_t(3+d)^{3/2}, \quad (68)$$

we find the inequality (64) by applying Lemma 10, the inequality (65) holds since  $z_{J_t, i} = z'_{J_t, i}$  for any  $i \neq i^*$ , we find (66) by using the triangle inequality and  $\beta$ -smoothness (for  $i \neq i^*$ ) and  $L$ -Lipschitz condition to bound the norm of the gradients  $\nabla_w f(w, z_{J_t, i^*})|_{w=w_t}$  and  $\nabla_w f(w, z'_{J_t, i^*})|_{w=w'_t}$ . In (67) we apply Lemma 12 to bound the quantity  $\|G_{J_t}(w_t) - G'_{J_t}(w'_t)\|$ . Under the selection of  $\mu \leq cL\Gamma_K^d/(n\beta(3+d)^{3/2})$ , Eq. (68) gives the second part of the inequality in Lemma 13.  $\square$

**Proof of Theorem 14** We apply Lemma 13 to get

$$\mathbb{E}[\delta_{t+1}|\mathcal{E}_{\delta_{t_0}}] \\ = \mathbb{P}(\mathcal{E}_t)\mathbb{E}[\delta_{t+1}|\mathcal{E}_t, \mathcal{E}_{\delta_{t_0}}] + \mathbb{P}(\mathcal{E}_t^c)\mathbb{E}[\delta_{t+1}|\mathcal{E}_t^c, \mathcal{E}_{\delta_{t_0}}] \\ = \left(1 - \frac{m}{n}\right) \mathbb{E}[\delta_{t+1}|\mathcal{E}_t, \mathcal{E}_{\delta_{t_0}}] + \frac{m}{n} \mathbb{E}[\delta_{t+1}|\mathcal{E}_t^c, \mathcal{E}_{\delta_{t_0}}] \\ = \left(1 - \frac{m}{n}\right) \left( (1 + \beta\alpha_t\Gamma_K^d) \mathbb{E}[\delta_t|\mathcal{E}_{\delta_{t_0}}] + \frac{cL\alpha_t}{n}\Gamma_K^d \right) \\ + \frac{m}{n} \left( 1 + \frac{m-1}{m}\beta\alpha_t\Gamma_K^d \right) \mathbb{E}[\delta_t|\mathcal{E}_{\delta_{t_0}}] + \frac{m}{n} \frac{2L\alpha_t}{m}\Gamma_K^d + \frac{m}{n} \frac{cL\alpha_t}{n}\Gamma_K^d \\ = \left(1 + \beta\alpha_t\Gamma_K^d \left(1 - \frac{1}{n}\right)\right) \mathbb{E}[\delta_t|\mathcal{E}_{\delta_{t_0}}] + \frac{2L\alpha_t}{n}\Gamma_K^d + \frac{cL\alpha_t}{n}\Gamma_K^d. \quad (69)$$

The last display characterizes the general case of nonconvex loss and coincides with the inequality (17) (since  $\eta = 1 + \beta\alpha_t$ ). As a consequence the solution of the recursion (69) is

$$\mathbb{E}[\delta_T|\mathcal{E}_{\delta_{t_0}}] \leq \frac{(2+c)L\Gamma_K^d}{n} \sum_{t=t_0+1}^T \alpha_t \prod_{j=t+1}^T \left(1 + \beta\alpha_j\Gamma_K^d \left(1 - \frac{1}{n}\right)\right). \quad (70)$$

The last display completes the proof.  $\square$

## D Full-Batch GD

As a byproduct of our analysis we derive generalization error bounds for the full-batch gradient decent. Although our results reduce to the full-batch GD by a direct calculation of the limits  $c \rightarrow 0$ ,  $K \rightarrow \infty$  and setting the batch size  $m$  equal to  $n$ , we separately prove generalization error bounds for the full-batch GD for clarity.

**Corollary 15 [Stability and Generalization Error of Full-Batch GD | Nonconvex Loss]** *Assume that the loss function  $f(\cdot, z)$  is  $L$ -Lipschitz and  $\beta$ -smooth for all  $z \in \mathcal{Z}$ . Consider the (deterministic) full-batch GD algorithm, initial state  $W_0 = W'_0$ , iterates  $W_t = G_S(W_t)$ ,  $W'_t = G_{S'}(W'_t)$  for  $t > 0$ , and with final-iterate estimates  $W_T$  and  $W'_T$  corresponding to the data-sets  $S, S'$ , respectively (that differ in exactly one entry). Then the discrepancy  $\delta_T \triangleq \|W_T - W'_T\|$  satisfies the inequality*

$$\delta_T \leq \frac{2L}{n} \sum_{t=1}^T \alpha_t \prod_{j=t+1}^T \left(1 + \frac{n-1}{n}\alpha_j\beta\right). \quad (71)$$

Further if  $\alpha_t \leq C/t$  for any  $t > 0$  and some  $C > 0$  then

$$|\epsilon_{gen}| = |\mathbb{E}_S[\mathbb{E}_z[f(W_T, z)] - \frac{1}{n} \sum_{z \in S} f(W_T, z)]| \leq \frac{2L^2 (eT)^{C\beta}}{n} \min \{C + \beta^{-1}, C \log(eT)\}. \quad (72)$$

The proof of Corollary 15 follows.

**Proof of Corollary 15 (Full-Batch GD)** In the case of full-batch GD the algorithm is deterministic and we assume that  $z_1, z_2, \dots, z_i, \dots, z_n, z'_i$  are i.i.d. and define  $S \triangleq (z_1, z_2, \dots, z_i, \dots, z_n)$  and  $S' \triangleq (z_1, z_2, \dots, z'_i, \dots, z_n)$ ,  $W_0 = W'_0$ , the updates for any  $t \geq 1$  are

$$W_{t+1} = W_t - \frac{\alpha_t}{n} \sum_{j=1}^n \nabla f(W_t, z_j), \quad (73)$$

$$W'_{t+1} = W'_t - \frac{\alpha_t}{n} \sum_{j=1, j \neq i}^n \nabla f(W'_t, z_j) - \frac{\alpha_t}{n} \nabla f(W'_t, z'_i). \quad (74)$$

Then for any  $t \geq 1$

$$\begin{aligned} \delta_{t+1} &\leq \delta_t + \frac{\alpha_t}{n} \left\| \sum_{j=1, j \neq i}^n \nabla f(W_t, z_j) - \nabla f(W'_t, z_j) \right\| + \frac{\alpha_t}{n} \|\nabla f(W_t, z_i) - \nabla f(W'_t, z'_i)\| \\ &\leq \delta_t + \frac{\alpha_t(n-1)}{n} \beta \delta_t + \frac{2L\alpha_t}{n} \\ &= \left(1 + \frac{(n-1)}{n} \beta \alpha_t\right) \delta_t + \frac{2L\alpha_t}{n}. \end{aligned}$$

Then by solving the recursion we find

$$\delta_T \leq \frac{2L}{n} \sum_{t=1}^T \alpha_t \prod_{j=t+1}^T \left(1 + \frac{n-1}{n} \alpha_j \beta\right). \quad (75)$$

Under the choice  $\alpha_t \leq C/t$  the last display gives

$$\begin{aligned} \delta_T &\leq \frac{2L}{n} \sum_{t=1}^T \frac{C}{t} \prod_{j=t+1}^T \left(1 + \frac{n-1}{n} \frac{C}{j} \beta\right) \\ &\leq \frac{2L}{n} \sum_{t=1}^T \frac{C}{t} \prod_{j=t+1}^T \left(1 + \frac{C}{j} \beta\right) \\ &\leq \frac{2L}{n} \sum_{t=1}^T \frac{C}{t} \prod_{j=t+1}^T \exp\left(\frac{C}{j} \beta\right) \\ &= \frac{2L}{n} \sum_{t=1}^T \frac{C}{t} \exp\left(\sum_{j=t+1}^T \frac{C}{j} \beta\right) \\ &\leq \frac{2L}{n} \sum_{t=1}^T \frac{C}{t} \exp\left(C\beta \left(1 + \log \frac{T}{t+1}\right)\right) \\ &= \frac{2L (eT)^{C\beta}}{n} \sum_{t=1}^T \frac{C}{t} \frac{1}{(t+1)^{C\beta}} \\ &\leq \frac{2L (eT)^{C\beta}}{n} \sum_{t=1}^T \frac{C}{t^{C\beta+1}} \end{aligned}$$

$$\leq \frac{2CL(eT)^{C\beta}}{n} \min \left\{ \frac{C\beta + 1}{C\beta}, \log(eT) \right\}. \quad (76)$$

Then

$$|\mathbb{E}_S[R_S(A_S) - R(A_S)]| = |\mathbb{E}_{S, z'_i}[f(W_T, z'_i) - f(W'_T, z'_i)]| \quad (77)$$

$$\leq \mathbb{E}_{S, z'_i}[|f(W_T, z'_i) - f(W'_T, z'_i)|] \quad (78)$$

$$\leq L\mathbb{E}_{S, z'_i}\|W_T - W'_T\|$$

$$\leq \frac{2L^2(eT)^{C\beta}}{n} \min \{C + \beta^{-1}, C \log(eT)\}. \quad (79)$$

In the above, Eq. (77) follows from [17, Lemma 7], the inequality (78) holds under the Lipschitz property of the loss  $f(\cdot, z)$  for any  $z$ . Finally, we find the last inequality (79) by applying the bound in (76).  $\square$

## E Excess Risk

Define the time average parameters as output of the algorithm

$$\bar{W}_T = \frac{1}{\sum_{t=1}^T \alpha_t} \sum_{t=1}^T \alpha_t W_t, \quad (80)$$

then

$$\mathbb{E}[\|\bar{W}_T - \bar{W}'_T\| | \mathcal{E}_{\delta_{t_0}}] \leq \frac{1}{\sum_{t=1}^T \alpha_t} \sum_{t=1}^T \alpha_t \mathbb{E}[\|W_t - W'_t\| | \mathcal{E}_{\delta_{t_0}}] \quad (81)$$

$$= \frac{1}{\sum_{t=1}^T \alpha_t} \sum_{t=1}^T \alpha_t \mathbb{E}[\delta_t | \mathcal{E}_{\delta_{t_0}}] \quad (82)$$

$$\leq \frac{1}{\sum_{t=1}^T \alpha_t} \sum_{t=1}^T \alpha_t \mathbb{E}[\delta_T | \mathcal{E}_{\delta_{t_0}}] = \mathbb{E}[\delta_T | \mathcal{E}_{\delta_{t_0}}]. \quad (83)$$

The L-Lipschitz property of the loss and the inequality (83) give

$$|\bar{\epsilon}_{\text{gen}}| \triangleq |\mathbb{E}[f(\bar{W}_T, z'_i) - f(\bar{W}'_T, z'_i)]| \leq \mathbb{E}[|f(\bar{W}_T, z'_i) - f(\bar{W}'_T, z'_i)|] \leq L\mathbb{E}[\delta_T | \mathcal{E}_{\delta_{t_0}}]. \quad (84)$$

Additionally, for any convex loss it is true that,

$$\begin{aligned} \bar{\epsilon}_{\text{opt}} \triangleq \mathbb{E}[R(\bar{W}_T)] - R(w^*) &\leq \frac{1}{\sum_{t=1}^T \alpha_t} \sum_{t=1}^T \alpha_t (\mathbb{E}[R(W_t)] - R(w^*)) \\ &\leq \frac{1}{\sum_{t=1}^T \alpha_t} \left( \frac{1}{2} \|W_0 - W^*\|^2 + \frac{d+4}{2} L \sum_{t=1}^T \alpha_t^2 \right). \end{aligned} \quad (85)$$

If  $\|W_0 - W^*\|^2 \leq R$ ,  $K = 1$ , then we may choose

$$\alpha_t = \frac{CR}{L\sqrt{3d-1t}}. \quad (86)$$

From (85) and (86) we find

$$\begin{aligned} \bar{\epsilon}_{\text{opt}} &\leq \frac{L\sqrt{3d-1}}{CR \log(T+1)} \left( \frac{R^2}{2} + \frac{d+4}{2} L \left( \frac{C^2 R^2}{L^2(3d-1)} \right) \frac{\pi^2}{6} \right) \\ &\leq \frac{RL\sqrt{3d-1}}{2C \log(T+1)} \left( 1 + \frac{C^2}{L} \right). \end{aligned} \quad (87)$$

Further, inequality (84), the choice of learning rate in (86) and Lemma 11 give

$$|\bar{\epsilon}_{\text{gen}}| \leq \frac{1 + \sqrt{3d-1}}{\sqrt{3d-1}} \frac{(eT)^{CR\beta/L}(2+c)L^2}{n} \min \left\{ \frac{CR\beta/L + 1}{\beta}, \frac{CR}{L} \log(eT) \right\} \quad (88)$$

$$\leq \frac{2(eT)^{CR\beta/L}(2+c)L^2}{n} \min \left\{ \frac{CR\beta/L+1}{\beta}, \frac{CR}{L} \log(eT) \right\}. \quad (89)$$

If  $C \leq L/2R\beta$ , then

$$|\bar{\epsilon}_{\text{gen}}| \leq \frac{2\sqrt{eT}(2+c)L^2}{n} \min \left\{ \frac{3}{2\beta}, \frac{1}{2\beta} \log(eT) \right\} \leq \frac{3\sqrt{eT}(2+c)L^2/\beta}{n}. \quad (90)$$

We conclude that

$$\bar{\epsilon}_{\text{excess}} \leq |\bar{\epsilon}_{\text{gen}}| + \bar{\epsilon}_{\text{opt}} \leq \frac{3\sqrt{eT}(2+c)L^2/\beta}{n} + \frac{\sqrt{3d-1}R^2\beta}{\log(T+1)} \left( 1 + \frac{L}{4R^2\beta^2} \right). \quad (91)$$

Similarly, by using Lemma 10 and the optimization error derivation from prior works [13], we find the corresponding bound for  $K \geq 1$  function evaluations,

$$\bar{\epsilon}_{\text{excess}} \leq \frac{3\sqrt{eT}(2+c)L^2/\beta}{n} + \frac{\left( 1 + \sqrt{\frac{3d-1}{K}} \right) R^2\beta}{\log(T)} \left( 1 + \frac{L}{4R^2\beta^2} \right). \quad (92)$$
